# Supplementary material for: Genome-Wide Association Study Reveals the QTLs for Seed Storability in World Rice Core Collections
Source: MDPI journal article supplement (doi:10.3390/plants10040812), 2021-04-20
Supplement: s1 [file s1]

**Table S1.** Basic information of 456 rice accessions.

| ID   | Name           | Subpopulation based<br>on PC analysis | K9_group_<br>Admixture | Genetic_Stock_varname                | Country source                      |
|------|----------------|---------------------------------------|------------------------|--------------------------------------|-------------------------------------|
| C001 | IRIS_313-8530  | Indica                                | XI-2                   | DHANE BURWA::IRGC 10105-1            | India                               |
| C002 | IRIS_313-8935  | Indica                                | XI-adm                 | ARC 18061::IRGC 47650-1              | India                               |
| C003 | IRIS_313-10327 | Japonica                              | GJ-trp                 | CAROLINO BLANCO::IRGC 117249-1       | Peru                                |
| C004 | IRIS_313-8768  | Japonica                              | GJ-trp                 | MOROFIN::IRGC 56698-1                | Cote d'Ivoire                       |
| C005 | IRIS_313-10392 | Indica                                | XI-1B                  | IR 77390-1-6-4-19-1-B::IRGC 117303-1 | Philippines                         |
| C006 | IRIS_313-11821 | Indica                                | XI-2                   | 19::IRGC 70786-1                     | India                               |
| C007 | IRIS_313-11806 | Indica                                | XI-1A                  | 78 XUAN WU::IRGC 70475-1             | China                               |
| C008 | IRIS_313-10509 | Indica                                | XI-3                   | AMBARIKORI::IRGC 5132-1              | West Africa                         |
| C009 | IRIS_313-11745 | Indica                                | XI-1A                  | AN FU ZHAN::IRGC 67878-1             | China                               |
| C010 | IRIS_313-11493 | Indica                                | XI-adm                 | AR 133::IRGC 53942-1                 | India                               |
| C011 | IRIS_313-10857 | Indica                                | admix                  | ARC 10825::IRGC 21082-1              | India                               |
| C012 | IRIS_313-10858 | Indica                                | XI-adm                 | ARC 10894::IRGC 21122-1              | India                               |
| C013 | IRIS_313-11295 | Indica                                | admix                  | ARC 11397::IRGC 42664-1              | India                               |
| C014 | IRIS_313-10871 | Indica                                | cA (Aus)               | ARC 11777::IRGC 21639-1              | India                               |
| C015 | IRIS_313-10891 | Indica                                | cA (Aus)               | ARC 12867::IRGC 22401-1              | India                               |
| C016 | IRIS_313-10892 | Indica                                | cA (Aus)               | ARC 12920::IRGC 22450-1              | India                               |
| C017 | IRIS_313-10894 | Indica                                | admix                  | ARC 13204::IRGC 22558-1              | India                               |
| C018 | IRIS_313-11272 | Indica                                | cA (Aus)               | ARC 14756::IRGC 41736-1              | India                               |
| C019 | IRIS_313-11274 | Indica                                | cA (Aus)               | ARC 14901::IRGC 41811-1              | India                               |
| C020 | IRIS_313-10666 | Indica                                | XI-adm                 | ARC 6218::IRGC 12255-1               | India                               |
| C021 | IRIS_313-10852 | Indica                                | cA (Aus)               | ARC 7336::IRGC 20606-1               | India                               |
| C022 | IRIS_313-11812 | Indica                                | XI-3                   | ASFALA::IRGC 70650-1                 | Kenya                               |
| C023 | IRIS_313-11048 | Indica                                | cA (Aus)               | AUS 171::IRGC 29004-1                | Bangladesh                          |
| C024 | IRIS_313-11050 | Indica                                | cA (Aus)               | AUS 233::IRGC 29036-1                | Bangladesh                          |
| C025 | IRIS_313-11051 | Indica                                | cA (Aus)               | AUS 242::IRGC 29040-1                | Bangladesh                          |
| C026 | IRIS_313-11055 | Indica                                | cA (Aus)               | AUS 299::IRGC 29087-1                | Bangladesh                          |
| C027 | IRIS_313-11057 | Indica                                | cA (Aus)               | AUS 308::IRGC 29096-1                | Bangladesh                          |
| C028 | IRIS_313-11058 | Indica                                | cA (Aus)               | AUS 329::IRGC 29116-1                | Bangladesh                          |
| C029 | IRIS_313-11656 | Indica                                | XI-adm                 | B 3913 B 16-20 ST 28::IRGC 63099-1   | Indonesia                           |
| C030 | IRIS_313-11878 | Indica                                | XI-1A                  | BAI RI XIAN::IRGC 72588-1            | China                               |
| C031 | IRIS_313-11062 | Japonica                              | cB (Bas)               | BEGUNBICHI 33::IRGC 29260-1          | Bangladesh                          |
| C032 | IRIS_313-11823 | Indica                                | XI-2                   | BHU BHUSI::IRGC 70803-1              | India                               |
| C033 | IRIS_313-11788 | Japonica                              | GJ-adm                 | CANLUBANG::IRGC 69816-1              | Philippines                         |
| C034 | IRIS_313-10997 | Indica                                | XI-3                   | CEMPO MANGGAR::IRGC 27107-1          | Indonesia                           |
| C035 | IRIS_313-12121 | Indica                                | XI-3                   | CHA LIENG::IRGC 84920-1              | Lao People's<br>Democratic Republic |
| C036 | IRIS_313-11692 | Indica                                | XI-1A                  | CHIAYI WU-K'O::IRGC 64974-1          | Taiwan                              |
| C037 | IRIS_313-11693 | Indica                                | XI-adm                 | CHING CH'UNG::IRGC 65002-1           | Taiwan                              |
| C038 | IRIS_313-11737 | Indica                                | cA (Aus)               | CHUNDI::IRGC 67486-1                 | India                               |
| C039 | IRIS_313-11664 | Indica                                | XI-adm                 | CUN GU NUO::IRGC 63576-1             | China                               |
| C040 | IRIS_313-11795 | Indica                                | XI-1A                  | DA GU AI 7::IRGC 70075-1             | China                               |
| C041 | IRIS_313-11720 | Indica                                | XI-3                   | DAW 85::IRGC 66704-1                 | Thailand                            |
| C042 | IRIS_313-11705 | Indica                                | XI-3                   | DAWK PUD KHAO::IRGC 65808-1          | Thailand                            |
| C043 | IRIS_313-11700 | Indica                                | XI-3                   | DAW NOK KAEN::IRGC 65548-1           | Thailand                            |
| C044 | IRIS_313-11671 | Indica                                | XI-2                   | DERAWA::IRGC 64106-1                 | Nepal                               |
| C045 | IRIS_313-11824 | Indica                                | XI-2                   | DHANIYA PHOOL::IRGC 70811-1          | India                               |
| C046 | IRIS_313-11723 | Indica                                | XI-2                   | DISSIGBE::IRGC 66916-1               | Guinea                              |
| C047 | IRIS_313-10766 | Japonica                              | GJ-trp                 | DJALAWARA::IRGC 17471-1              | Indonesia                           |
| C048 | IRIS_313-10602 | Indica                                | cA (Aus)               | DM 49::IRGC 8775-1                   | Bangladesh                          |
| C049 | IRIS_313-12334 | Indica                                | XI-3                   | DO KHAW::IRGC 106977-1               | Lao People's<br>Democratic Republic |
| C050 | IRIS_313-10544 | Indica                                | XI-2                   | DONGREM::IRGC 6688-1                 | India                               |

|      |                |          |          |                                         |                                     |
|------|----------------|----------|----------|-----------------------------------------|-------------------------------------|
| C051 | IRIS_313-12193 | Indica   | XI-3     | DO NOUAN::IRGC 89648-1                  | Lao People's<br>Democratic Republic |
| C052 | IRIS_313-11796 | Indica   | XI-1A    | DU GEN CHUAN::IRGC 70083-1              | China                               |
| C053 | IRIS_313-10605 | Indica   | cA (Aus) | DV 86::IRGC 8840-1                      | Bangladesh                          |
| C054 | IRIS_313-11746 | Indica   | XI-1A    | E 2070::IRGC 67981-1                    | China                               |
| C055 | IRIS_313-11747 | Indica   | XI-adm   | E 4197::IRGC 68004-1                    | China                               |
| C056 | IRIS_313-12259 | Indica   | XI-3     | EA NOUAN::IRGC 95147-1                  | Lao People's<br>Democratic Republic |
| C057 | IRIS_313-11798 | Indica   | XI-1B    | E ZI 100::IRGC 70192-1                  | China                               |
| C058 | IRIS_313-11799 | Indica   | XI-1A    | E ZI 110::IRGC 70201-1                  | China                               |
| C059 | IRIS_313-11801 | Indica   | XI-adm   | FAN WU::IRGC 70245-1                    | China                               |
| C060 | IRIS_313-12033 | Indica   | XI-1A    | GAO JIAO HONG::IRGC 80920-1             | China                               |
| C061 | IRIS_313-11748 | Indica   | XI-adm   | GAO JIAO YING GAN ZHAN::IRGC<br>68053-1 | China                               |
| C062 | IRIS_313-11679 | Indica   | XI-3     | GASET BOW::IRGC 64316-1                 | Thailand                            |
| C063 | IRIS_313-11929 | Japonica | GJ-trp   | GILINGAN MARANGRAS::IRGC 75213-1        | Philippines                         |
| C064 | IRIS_313-10772 | Indica   | XI-3     | GOJOT::IRGC 17669-1                     | Indonesia                           |
| C065 | IRIS_313-10503 | Indica   | XI-1A    | HA GOO::IRGC 4577-1                     | China                               |
| C066 | IRIS_313-11741 | Indica   | XI-2     | HERATH BANDA::IRGC 67630-1              | Sri Lanka                           |
| C067 | IRIS_313-12128 | Indica   | XI-3     | HMA GNENG::IRGC 85751-1                 | Lao People's<br>Democratic Republic |
| C068 | IRIS_313-11607 | Indica   | XI-2     | HOLDIGANTHI::IRGC 61105-1               | India                               |
| C069 | IRIS_313-11727 | Indica   | XI-1A    | HONG YANG ZAO 3::IRGC 67177-1           | China                               |
| C070 | IRIS_313-10968 | Indica   | XI-1A    | IH PEN SHIM MING::IRGC 26067-1          | Brazil                              |
| C071 | IRIS_313-12127 | Indica   | XI-3     | INPONG::IRGC 85524-1                    | Lao People's<br>Democratic Republic |
| C072 | IRIS_313-11979 | Indica   | XI-1B    | IR 19661-364-1-2-3::IRGC 78061-1        | Philippines                         |
| C073 | IRIS_313-11516 | Indica   | XI-adm   | IR 3839-1::IRGC 55946-1                 | Philippines                         |
| C074 | IRIS_313-11978 | Indica   | XI-1B    | IR 5657-33-2::IRGC 77992-1              | Philippines                         |
| C075 | IRIS_313-11717 | Indica   | XI-adm   | JATI MANI::IRGC 66565-1                 | Indonesia                           |
| C076 | IRIS_313-11802 | Indica   | XI-1A    | JIE CAO ZHAN::IRGC 70305-1              | China                               |
| C077 | IRIS_313-11622 | Indica   | XI-1A    | JUAN YE LAI::IRGC 61825-1               | China                               |
| C078 | IRIS_313-11324 | Indica   | cA (Aus) | KALABOKRI::IRGC 43872-1                 | Bangladesh                          |
| C079 | IRIS_313-11097 | Indica   | XI-adm   | KALAGNON::IRGC 30335-1                  | Philippines                         |
| C080 | IRIS_313-11489 | Indica   | cA (Aus) | KALU T 139::IRGC 53670-1                | India                               |
| C081 | IRIS_313-11816 | Indica   | XI-adm   | KARILETYONE::IRGC 70745-1               | Myanmar                             |
| C082 | IRIS_313-10785 | Japonica | GJ-trp   | KETAN SLAWI::IRGC 17963-1               | Indonesia                           |
| C083 | IRIS_313-11708 | Indica   | XI-3     | KHAO YAI GUANG::IRGC 65972-1            | Thailand                            |
| C084 | IRIS_313-11814 | Indica   | XI-3     | KIKUBA::IRGC 70722-1                    | Kenya                               |
| C085 | IRIS_313-11416 | Indica   | XI-2     | KONAMANI::IRGC 49806-1                  | India                               |
| C086 | IRIS_313-11724 | Indica   | XI-3     | KONYAN::IRGC 66931-1                    | Guinea                              |
| C087 | IRIS_313-11543 | Indica   | XI-3     | KYUN TAW SEIN::IRGC 58072-1             | Myanmar                             |
| C088 | IRIS_313-11750 | Indica   | XI-adm   | L 10595::IRGC 68109-1                   | China                               |
| C089 | IRIS_313-11751 | Indica   | XI-adm   | L 10833::IRGC 68121-1                   | China                               |
| C090 | IRIS_313-10999 | Japonica | GJ-trp   | LANDEO::IRGC 27164-1                    | Indonesia                           |
| C091 | IRIS_313-11234 | Indica   | XI-adm   | LIGUNGTUNG::IRGC 38786-1                | Philippines                         |
| C092 | IRIS_313-12048 | Indica   | XI-3     | LIMA::IRGC 81487-1                      | Indonesia                           |
| C093 | IRIS_313-10748 | Indica   | XI-adm   | LUA DUC::IRGC 16718-1                   | Viet Nam                            |
| C094 | IRIS_313-11667 | Indica   | XI-1A    | LUO AI ZAO 3::IRGC 63730-1              | China                               |
| C095 | IRIS_313-11728 | Indica   | XI-3     | LUO SI ZHAN::IRGC 67211-1               | China                               |
| C096 | IRIS_313-11752 | Indica   | XI-1A    | M 6034-1::IRGC 68193-1                  | China                               |
| C097 | IRIS_313-12349 | Japonica | GJ-sbtrp | MAK KHEUA DENG::IRGC 107709-1           | Lao People's<br>Democratic Republic |
| C098 | IRIS_313-12350 | Japonica | GJ-sbtrp | MAK KHEUA KANG::IRGC 107712-1           | Lao People's<br>Democratic Republic |
| C099 | IRIS_313-11736 | Japonica | GJ-trp   | MALAGKIT (PINELIPE)::IRGC 67444-1       | Philippines                         |
| C100 | IRIS_313-11945 | Indica   | XI-2     | MALIKULI::IRGC 76237-1                  | Bangladesh                          |

|      |                |          |          |                               |                                     |
|------|----------------|----------|----------|-------------------------------|-------------------------------------|
| C101 | IRIS_313-11882 | Indica   | XI-1A    | MAN TIAN QING::IRGC 72776-1   | China                               |
| C102 | IRIS_313-12066 | Indica   | XI-3     | MARAMAY::IRGC 82628-1         | Philippines                         |
| C103 | IRIS_313-10609 | Indica   | XI-adm   | MATHOLUWA::IRGC 8901-1        | Sri Lanka                           |
| C104 | IRIS_313-11784 | Indica   | XI-1B    | MBEIMBEIHUN::IRGC 69730-1     | Sierra Leone                        |
| C105 | IRIS_313-11760 | Indica   | XI-2     | MENAHARA 505::IRGC 68709-1    | Madagascar                          |
| C106 | IRIS_313-10794 | Japonica | GJ-trp   | MENDUNGAN::IRGC 18245-1       | Indonesia                           |
| C107 | IRIS_313-11811 | Indica   | XI-2     | MOSHI::IRGC 70648-1           | Kenya                               |
| C108 | IRIS_313-11815 | Indica   | XI-3     | MOSHI::IRGC 70730-1           | Kenya                               |
| C109 | IRIS_313-10440 | Japonica | GJ-tmp   | NAGKAYAT::IRGC 584-1          | Philippines                         |
| C110 | IRIS_313-12355 | Indica   | XI-adm   | NASAENG::IRGC 107819-1        | Lao People's<br>Democratic Republic |
| C111 | IRIS_313-11642 | Indica   | XI-2     | NCS 599::IRGC 62373-1         | India                               |
| C112 | IRIS_313-11643 | Indica   | XI-1B    | NCS 603 B::IRGC 62377-1       | India                               |
| C113 | IRIS_313-11644 | Indica   | XI-2     | NCS 745::IRGC 62466-1         | India                               |
| C114 | IRIS_313-11645 | Indica   | XI-2     | NCS 766::IRGC 62478-1         | India                               |
| C115 | IRIS_313-11648 | Indica   | XI-2     | NCS 830::IRGC 62518-1         | India                               |
| C116 | IRIS_313-11683 | Indica   | XI-3     | NIAW KHIW NGOO::IRGC 64563-1  | Thailand                            |
| C117 | IRIS_313-11841 | Indica   | XI-3     | NIAW NARAI::IRGC 71353-1      | Thailand                            |
| C118 | IRIS_313-11762 | Indica   | XI-2     | NS 1515::IRGC 68947-1         | Madagascar                          |
| C119 | IRIS_313-11761 | Indica   | XI-2     | NS 199::IRGC 68864-1          | Cote d'Ivoire                       |
| C120 | IRIS_313-11764 | Indica   | XI-3     | P 41::IRGC 68987-1            | Liberia                             |
| C121 | IRIS_313-10954 | Indica   | XI-3     | PADI GRUNDUL 1::IRGC 25493-1  | Indonesia                           |
| C122 | IRIS_313-10682 | Indica   | XI-3     | PA KHENG::IRGC 12996-1        | Lao People's<br>Democratic Republic |
| C123 | IRIS_313-11820 | Indica   | XI-3     | PAKISTANHMWE::IRGC 70763-1    | Myanmar                             |
| C124 | IRIS_313-11738 | Indica   | XI-2     | PAUNDRI::IRGC 67527-1         | India                               |
| C125 | IRIS_313-12135 | Indica   | XI-1B    | PERUBAK LUEY::IRGC 86436-1    | Malaysia                            |
| C126 | IRIS_313-11763 | Indica   | XI-adm   | PJ 110::IRGC 68981-1          | Cameroon                            |
| C127 | IRIS_313-11685 | Indica   | XI-3     | PLAWNG SAENG::IRGC 64595-1    | Thailand                            |
| C128 | IRIS_313-11730 | Indica   | XI-adm   | QING ER XIAO 2::IRGC 67255-1  | China                               |
| C129 | IRIS_313-11731 | Indica   | XI-adm   | QING TAI AI::IRGC 67273-1     | China                               |
| C130 | IRIS_313-11732 | Indica   | XI-1A    | QING ZAO 3::IRGC 67281-1      | China                               |
| C131 | IRIS_313-11807 | Indica   | XI-adm   | R 582::IRGC 70504-1           | Colombia                            |
| C132 | IRIS_313-10649 | Japonica | GJ-trp   | RACION 1::IRGC 11340-1        | Philippines                         |
| C133 | IRIS_313-11191 | Indica   | cA (Aus) | RANRUWAN::IRGC 36360-1        | Sri Lanka                           |
| C134 | IRIS_313-11668 | Indica   | XI-1A    | RONG DAO 4::IRGC 63820-1      | China                               |
| C135 | IRIS_313-11789 | Indica   | XI-2     | SABORAMANDALOFO::IRGC 69875-1 | Madagascar                          |
| C136 | IRIS_313-11436 | Japonica | GJ-trp   | SAKAZELE (538)::IRGC 50880-1  | Cote d'Ivoire                       |
| C137 | IRIS_313-11034 | Indica   | cA (Aus) | SANTHI 206::IRGC 28215-1      | Pakistan                            |
| C138 | IRIS_313-11460 | Indica   | XI-2     | SELHI::IRGC 52760-1           | India                               |
| C139 | IRIS_313-11733 | Indica   | XI-1A    | SHUANG BAI AI 2::IRGC 67309-1 | China                               |
| C140 | IRIS_313-11734 | Indica   | XI-1A    | SI CHAO 1::IRGC 67335-1       | China                               |
| C141 | IRIS_313-10941 | Indica   | XI-adm   | SINTHA::IRGC 24687-1          | Indonesia                           |
| C142 | IRIS_313-11655 | Japonica | GJ-tmp   | SI WAN 14::IRGC 63019-1       | China                               |
| C143 | IRIS_313-11716 | Indica   | XI-3     | SOSSOKA::IRGC 66478-1         | Guinea                              |
| C144 | IRIS_313-11089 | Indica   | XI-3     | SRAU THMOR::IRGC 29904-1      | Cambodia                            |
| C145 | IRIS_313-11787 | Indica   | XI-2     | TANDAKAY FINGO::IRGC 69793-1  | Gambia                              |
| C146 | IRIS_313-12024 | Indica   | XI-1B    | TOS 9795::IRGC 80142-1        | Sierra Leone                        |
| C147 | IRIS_313-11794 | Indica   | XI-2     | TSIPALA MENAHAR::IRGC 69979-1 | Madagascar                          |
| C148 | IRIS_313-10603 | Indica   | cA (Aus) | UCP 122::IRGC 8794-1          | Bangladesh                          |
| C149 | IRIS_313-11740 | Indica   | XI-adm   | UGAGA::IRGC 67604-1           | Ghana                               |
| C150 | IRIS_313-11791 | Indica   | XI-2     | VARY LAHY::IRGC 69908-1       | Madagascar                          |
| C151 | IRIS_313-11753 | Indica   | XI-1A    | XIANG CHANG ZAO::IRGC 68268-1 | China                               |
| C152 | IRIS_313-11805 | Indica   | XI-1A    | XI HONG GU::IRGC 70416-1      | China                               |
| C153 | IRIS_313-11453 | Indica   | XI-2     | ZINYA KOLAMBA::IRGC 52402-1   | India                               |
| C154 | IRIS_313-11528 | Indica   | XI-3     | ZO::IRGC 56914-1              | Cote d'Ivoire                       |
| C155 | IRIS_313-11202 | Japonica | GJ-tmp   | 4583::IRGC 36894-2            | China                               |

|      |                |          |          |                                   |                                  |
|------|----------------|----------|----------|-----------------------------------|----------------------------------|
| C156 | IRIS_313-10859 | Indica   | XI-adm   | ARC 10939::IRGC 21150-2           | India                            |
| C157 | IRIS_313-10863 | Indica   | XI-2     | ARC 11322::IRGC 21315-2           | India                            |
| C158 | IRIS_313-11256 | Indica   | XI-adm   | ARC 12411::IRGC 41047-2           | India                            |
| C159 | IRIS_313-10888 | Japonica | GJ-sbtrp | ARC 12726::IRGC 22288-2           | India                            |
| C160 | IRIS_313-11257 | Indica   | XI-adm   | ARC 12757::IRGC 41095-2           | India                            |
| C161 | IRIS_313-11297 | Japonica | admix    | ARC 13460::IRGC 42732-2           | India                            |
| C162 | IRIS_313-11258 | Japonica | cB (Bas) | ARC 13502::IRGC 41126-2           | India                            |
| C163 | IRIS_313-11260 | Indica   | XI-adm   | ARC 13591::IRGC 41177-2           | India                            |
| C164 | IRIS_313-11262 | Indica   | XI-adm   | ARC 13888::IRGC 41288-2           | India                            |
| C165 | IRIS_313-11263 | Indica   | XI-adm   | ARC 13919::IRGC 41313-2           | India                            |
| C166 | IRIS_313-11266 | Indica   | XI-adm   | ARC 14347::IRGC 41517-2           | India                            |
| C167 | IRIS_313-11267 | Indica   | XI-2     | ARC 14358::IRGC 41523-2           | India                            |
| C168 | IRIS_313-11269 | Indica   | XI-adm   | ARC 14632::IRGC 41650-2           | India                            |
| C169 | IRIS_313-11273 | Indica   | XI-adm   | ARC 14860::IRGC 41793-2           | India                            |
| C170 | IRIS_313-11301 | Indica   | XI-2     | ARC 14868::IRGC 43009-2           | India                            |
| C171 | IRIS_313-11289 | Japonica | cB (Bas) | ARC 18578::IRGC 42459-2           | India                            |
| C172 | IRIS_313-10847 | Indica   | XI-adm   | ARC 6015::IRGC 20314-2            | India                            |
| C173 | IRIS_313-12109 | Indica   | XI-3     | ARITH::IRGC 84347-2               | Cambodia                         |
| C174 | IRIS_313-10995 | Indica   | XI-3     | ASE BAKKA LOMPO::IRGC 26988-2     | Indonesia                        |
| C175 | IRIS_313-11047 | Indica   | cA (Aus) | AUS 84::IRGC 28947-2              | Bangladesh                       |
| C176 | IRIS_313-11239 | Indica   | XI-adm   | B 737 G-KN-23-1::IRGC 39203-2     | Indonesia                        |
| C177 | IRIS_313-10576 | Indica   | XI-2     | BAANYALOJOPOIHUN::IRGC 7928-2     | Sierra Leone                     |
| C178 | IRIS_313-11350 | Japonica | cB (Bas) | BAJAL::IRGC 45024-2               | India                            |
| C179 | IRIS_313-11351 | Indica   | XI-2     | BANCHI::IRGC 45055-2              | India                            |
| C180 | IRIS_313-10942 | Indica   | XI-3     | BANDANG BUNGKUAKLAN::IRGC 24697-2 | Indonesia                        |
| C181 | IRIS_313-11241 | Indica   | XI-2     | BR 116-3B-53::IRGC 39559-2        | Bangladesh                       |
| C182 | IRIS_313-10765 | Japonica | GJ-trp   | CERE KAWAT::IRGC 17401-2          | Indonesia                        |
| C183 | IRIS_313-11240 | Indica   | XI-adm   | CR 157-392-4::IRGC 39247-2        | India                            |
| C184 | IRIS_313-10986 | Indica   | XI-2     | HALDI JAON::IRGC 26638-2          | Bangladesh                       |
| C185 | IRIS_313-10614 | Indica   | XI-adm   | HAM MOON::IRGC 9135-2             | Hong Kong                        |
| C186 | IRIS_313-10824 | Indica   | XI-3     | HOING CANTEL::IRGC 19282-2        | Indonesia                        |
| C187 | IRIS_313-10718 | Indica   | cA (Aus) | KARUTHA SEENATI::IRGC 15515-2     | Sri Lanka                        |
| C188 | IRIS_313-11205 | Indica   | XI-2     | KAZALSAIL::IRGC 37161-2           | Bangladesh                       |
| C189 | IRIS_313-11386 | Indica   | XI-3     | KHAO DAWK MALI TIA::IRGC 47773-2  | Thailand                         |
| C190 | IRIS_313-11817 | Indica   | XI-adm   | KHAOSAING::IRGC 70746-2           | Myanmar                          |
| C191 | IRIS_313-11039 | Indica   | XI-1A    | KWANG LU AI 4::IRGC 28480-2       | China                            |
| C192 | IRIS_313-11338 | Indica   | XI-adm   | LOBANG (WHITE)::IRGC 44548-2      | Philippines                      |
| C193 | IRIS_313-10755 | Indica   | XI-3     | NEP BA BONG TO::IRGC 17005-2      | Viet Nam                         |
| C194 | IRIS_313-11242 | Indica   | XI-2     | OR 117-8::IRGC 39680-2            | India                            |
| C195 | IRIS_313-11224 | Indica   | XI-2     | PATNAI 31-679::IRGC 38149-2       | Bangladesh                       |
| C196 | IRIS_313-11079 | Indica   | XI-3     | PHAN PHAE::IRGC 29652-2           | Lao People's Democratic Republic |
| C197 | IRIS_313-11245 | Indica   | XI-adm   | RP 20-12::IRGC 40031-2            | India                            |
| C198 | IRIS_313-11228 | Indica   | XI-2     | SADAJIRA 19-339::IRGC 38361-2     | Bangladesh                       |
| C199 | IRIS_313-11392 | Indica   | XI-3     | SA MER::IRGC 48454-2              | Thailand                         |
| C200 | IRIS_313-10814 | Indica   | XI-3     | SIBORAS::IRGC 18816-2             | Indonesia                        |
| C201 | IRIS_313-10816 | Japonica | GJ-trp   | SIDJERO GUNDIL::IRGC 18829-2      | Indonesia                        |
| C202 | IRIS_313-11229 | Indica   | XI-2     | STRAW 23-428::IRGC 38416-2        | Bangladesh                       |
| C203 | IRIS_313-11372 | Indica   | XI-2     | SUFALDHULA::IRGC 46698-2          | India                            |
| C204 | IRIS_313-11081 | Indica   | XI-3     | THAO LOUANG::IRGC 29688-2         | Lao People's Democratic Republic |
| C205 | IRIS_313-10820 | Indica   | XI-3     | TJERE MANGGA::IRGC 19116-2        | Indonesia                        |
| C206 | IRIS_313-11037 | Indica   | cA (Aus) | 421::IRGC 28458-1                 | Pakistan                         |
| C207 | IRIS_313-12252 | Japonica | GJ-sbtrp | A MOUK::IRGC 94474-1              | Lao People's Democratic Republic |
| C208 | IRIS_313-11495 | Japonica | GJ-trp   | ANENOE::IRGC 54140-1              | Indonesia                        |

|      |                |          |          |                                    |                                              |
|------|----------------|----------|----------|------------------------------------|----------------------------------------------|
| C209 | IRIS_313-10883 | Japonica | admix    | ARC 12490::IRGC 22095-1            | India                                        |
| C210 | IRIS_313-10708 | Japonica | GJ-trp   | B 6311 A 5553-16-2::IRGC 14541-1   | United States of America                     |
| C211 | IRIS_313-11834 | Japonica | GJ-sbtrp | BUENG MONG LENG WE::IRGC 71088-1   | Thailand                                     |
| C212 | IRIS_313-11673 | Japonica | GJ-trp   | BURI BURING::IRGC 64174-1          | Philippines                                  |
| C213 | IRIS_313-10570 | Japonica | GJ-tmp   | CHUSEI HONEN::IRGC 7777-1          | Japan                                        |
| C214 | IRIS_313-11689 | Japonica | GJ-tmp   | DECHANGBYEO::IRGC 64858-1          | Korea, Republic of                           |
| C215 | IRIS_313-10677 | Japonica | GJ-tmp   | DEWAMINORI::IRGC 12743-1           | Japan                                        |
| C216 | IRIS_313-12258 | Japonica | GJ-sbtrp | DON::IRGC 95117-1                  | Lao People's Democratic Republic             |
| C217 | IRIS_313-11677 | Indica   | XI-3     | E NAWN KHAO::IRGC 64293-1          | Thailand                                     |
| C218 | IRIS_313-11835 | Indica   | XI-adm   | E NOI NAH::IRGC 71138-1            | Thailand                                     |
| C219 | IRIS_313-11651 | Japonica | GJ-tmp   | FEI ZHAO 12::IRGC 62683-1          | China                                        |
| C220 | IRIS_313-12018 | Japonica | GJ-trp   | FRENSI GBOI::IRGC 79983-1          | Sierra Leone                                 |
| C221 | IRIS_313-11635 | Indica   | XI-3     | GAM PERNG::IRGC 62135-1            | Thailand                                     |
| C222 | IRIS_313-11652 | Japonica | GJ-tmp   | GONG SHE 9::IRGC 62693-1           | China                                        |
| C223 | IRIS_313-12054 | Japonica | GJ-tmp   | HUA 24::IRGC 82127-1               | China                                        |
| C224 | IRIS_313-10834 | Japonica | GJ-sbtrp | IARI 11387::IRGC 19573-1           | India                                        |
| C225 | IRIS_313-10828 | Japonica | GJ-trp   | IKOGAN::IRGC 19412-1               | Philippines                                  |
| C226 | IRIS_313-11722 | Indica   | XI-adm   | KABERI::IRGC 66801-1               | Bangladesh                                   |
| C227 | IRIS_313-10681 | Indica   | XI-3     | KHAN THAI DO::IRGC 12990-1         | Lao People's Democratic Republic             |
| C228 | IRIS_313-10928 | Indica   | XI-3     | KHAO' SIM::IRGC 24094-1            | Thailand                                     |
| C229 | IRIS_313-12060 | Japonica | GJ-adm   | LIJIAN 942::IRGC 82399-1           | China                                        |
| C230 | IRIS_313-11467 | Indica   | XI-3     | MACAPAGAL::IRGC 52927-1            | Philippines                                  |
| C231 | IRIS_313-11658 | Japonica | GJ-trp   | MANYALOJOPOIHUN::IRGC 63350-1      | Sierra Leone                                 |
| C232 | IRIS_313-11663 | Indica   | admix    | MARHARORA::IRGC 63511-1            | Zimbabwe                                     |
| C233 | IRIS_313-11653 | Japonica | GJ-tmp   | MA SHE 8::IRGC 62750-1             | China                                        |
| C234 | IRIS_313-11809 | Indica   | cA (Aus) | MHARAKA::IRGC 70612-1              | Kenya                                        |
| C235 | IRIS_313-12129 | Japonica | GJ-sbtrp | MON LAI::IRGC 85857-1              | Lao People's Democratic Republic             |
| C236 | IRIS_313-11435 | Japonica | GJ-trp   | MONMINEUPLEU::IRGC 50873-1         | Cote d'Ivoire                                |
| C237 | IRIS_313-11739 | Japonica | GJ-trp   | NAKPUI::IRGC 67594-1               | Ghana                                        |
| C238 | IRIS_313-11924 | Japonica | GJ-sbtrp | NAM JAM::IRGC 75069-1              | Thailand                                     |
| C239 | IRIS_313-12071 | Japonica | GJ-sbtrp | NIA::IRGC 82728-1                  | Lao People's Democratic Republic             |
| C240 | IRIS_313-11786 | Indica   | XI-3     | N'YA NOFF::IRGC 69749-1            | Gambia                                       |
| C241 | IRIS_313-11189 | Japonica | admix    | PAIZ AMBARBU::IRGC 36179-1         | Union of Soviet Socialist Republics (Former) |
| C242 | IRIS_313-11900 | Japonica | GJ-sbtrp | PLE LIA::IRGC 73562-1              | Thailand                                     |
| C243 | IRIS_313-10582 | Japonica | GJ-trp   | QINOGNAS::IRGC 8135-1              | Philippines                                  |
| C244 | IRIS_313-11804 | Indica   | XI-1A    | QUN XUAN ZAO::IRGC 70371-1         | China                                        |
| C245 | IRIS_313-11033 | Japonica | admix    | RATRIO::IRGC 28181-1               | Pakistan                                     |
| C246 | IRIS_313-12281 | Japonica | GJ-trp   | SALAZANA::IRGC 97219-1             | Madagascar                                   |
| C247 | IRIS_313-11691 | Japonica | GJ-sbtrp | SHANGYIPA::IRGC 64928-1            | Bhutan                                       |
| C248 | IRIS_313-12228 | Japonica | GJ-sbtrp | SOM::IRGC 92221-1                  | Lao People's Democratic Republic             |
| C249 | IRIS_313-12312 | Japonica | GJ-sbtrp | TA SENG::IRGC 99176-1              | Lao People's Democratic Republic             |
| C250 | IRIS_313-11617 | Indica   | cA (Aus) | UPRH 33::IRGC 61505-1              | India                                        |
| C251 | IRIS_313-11767 | Indica   | admix    | VARY LAVA DE BOLOGNE::IRGC 69101-1 | Madagascar                                   |
| C252 | IRIS_313-11792 | Japonica | GJ-trp   | VONBOANGY::IRGC 69947-1            | Madagascar                                   |
| C253 | IRIS_313-10840 | Japonica | GJ-tmp   | YE ZO::IRGC 19888-1                | Korea, Republic of                           |
| C254 | IRIS_313-11035 | Indica   | admix    | ZIRA SHAHI::IRGC 28327-1           | Pakistan                                     |
| C255 | IRIS_313-11725 | Japonica | GJ-tmp   | ZUIHOU::IRGC 66982-1               | Japan                                        |

|      |                |          |          |                                   |                                          |
|------|----------------|----------|----------|-----------------------------------|------------------------------------------|
| C256 | IRIS_313-10725 | Indica   | XI-adm   | ERNEST::IRGC 15884-2              | Senegal                                  |
| C257 | IRIS_313-10779 | Indica   | XI-3     | KERAN DUKUH::IRGC 17822-2         | Indonesia                                |
| C258 | IRIS_313-11077 | Japonica | GJ-sbtrp | LAI HANG HMA::IRGC 29608-2        | Lao People's<br>Democratic Republic      |
| C259 | IRIS_313-8349  | Indica   | XI-2     | LATA MONA::IRGC 49333-1           | Bangladesh                               |
| C260 | B001           | Japonica | GJ-tmp   | Heibiao                           | China                                    |
| C261 | B003           | Japonica | GJ-adm   | Zaoshengbai                       | China                                    |
| C262 | B008           | Japonica | GJ-tmp   | Baxiang                           | Viet Nam                                 |
| C263 | B011           | Indica   | XI-adm   | CO 22                             | India                                    |
| C264 | B014           | Japonica | GJ-tmp   | Wuziluo 215                       | Uzbekistan                               |
| C265 | B015           | Indica   | XI-1A    | Kahamu                            | Romania                                  |
| C266 | B016           | Japonica | GJ-tmp   | Aomier 168                        | Hungary                                  |
| C267 | B018           | Japonica | GJ-trp   | American Huangkedao               | United States of<br>America              |
| C268 | B023           | Japonica | GJ-tmp   | Gaoliqiu                          | Democratic People's<br>Republic of Korea |
| C269 | B026           | Indica   | XI-adm   | Padi Ladang Ase Polo Komek        | Indonesia                                |
| C270 | B027           | Indica   | XI-3     | C 894-21                          | Philippines                              |
| C271 | B038           | Japonica | GJ-tmp   | Nabated A Smar                    | Egypt                                    |
| C272 | B040           | Indica   | XI-adm   | K 24                              | India                                    |
| C273 | B045           | Japonica | GJ-tmp   | Gongchengxiang                    | Japan                                    |
| C274 | B046           | Japonica | GJ-tmp   | Qiutianxiaoting                   | Japan                                    |
| C275 | B183           | Japonica | GJ-tmp   | Qingnuo Kyohatamochi              | Japan                                    |
| C276 | B190           | Japonica | GJ-trp   | ITA 221                           | Nigeria                                  |
| C277 | B053           | Japonica | GJ-trp   | 80 A 97 YR 303-304-1-3            | Australia                                |
| C278 | B197           | Indica   | XI-1A    | Taizhongxianxuan 2                | Taiwan                                   |
| C279 | B204           | Japonica | GJ-tmp   | Longhuamaohu                      | China                                    |
| C280 | B070           | Japonica | GJ-adm   | Laoguangtou 83                    | China                                    |
| C281 | B081           | Indica   | XI-1A    | Heidu 4                           | China                                    |
| C282 | B212           | Japonica | GJ-tmp   | Chikenuo                          | China                                    |
| C283 | B214           | Indica   | XI-1B    | Xuanenchangtanqingzhan            | China                                    |
| C284 | B216           | Indica   | XI-1A    | Hanmadao4                         | China                                    |
| C285 | B090           | Indica   | XI-adm   | Zimi                              | China                                    |
| C286 | B218           | Japonica | GJ-tmp   | Wuzidui                           | China                                    |
| C287 | B094           | Indica   | XI-1A    | Zinuo                             | China                                    |
| C288 | B097           | Indica   | XI-adm   | Jienuo                            | China                                    |
| C289 | B221           | Indica   | XI-1A    | Fanhaopi                          | China                                    |
| C290 | B100           | Japonica | GJ-tmp   | Hongkezhenuo                      | China                                    |
| C291 | B225           | Japonica | GJ-tmp   | Guantuibaihe 1                    | China                                    |
| C292 | B229           | Indica   | XI-adm   | Menjiading 2                      | China                                    |
| C293 | B111           | Japonica | GJ-tmp   | Zimangfeie                        | China                                    |
| C294 | B116           | Indica   | XI-adm   | Shufeng 101                       | China                                    |
| C295 | B125           | Indica   | XI-adm   | Xiangwanxian 3                    | China                                    |
| C296 | B129           | Indica   | XI-adm   | Hongainuo                         | China                                    |
| C297 | B149           | Indica   | XI-1A    | Haoxiang                          | China                                    |
| C298 | B247           | Indica   | XI-adm   | Jinnante B                        | China                                    |
| C299 | B261           | Indica   | XI-1A    | Meihuanuo                         | China                                    |
| C300 | B160           | Japonica | GJ-tmp   | Shuiyuan 300Li                    | China                                    |
| C301 | B266           | Japonica | GJ-sbtrp | Haomake (K)                       | China                                    |
| C302 | B164           | Indica   | cA (Aus) | Qingke                            | China                                    |
| C303 | IRIS_313-9422  | Indica   | cA (Aus) | CHUNGUR BALI::IRGC 25855-1        | Bangladesh                               |
| C304 | IRIS_313-10397 | Indica   | XI-1B    | IRGA 318-11-6-9-2B::IRGC 117339-1 | Colombia                                 |
| C305 | IRIS_313-8341  | Indica   | XI-adm   | BAT DO::IRGC 7014-1               | Viet Nam                                 |
| C306 | IRIS_313-8173  | Japonica | GJ-trp   | A 201::GERVEX 1638-C1             | United States of<br>America              |
| C307 | IRIS_313-7638  | Indica   | XI-adm   | ANGIFOTSY 685::GERVEX 4717-C1     | Madagascar                               |
| C308 | IRIS_313-8037  | Japonica | GJ-adm   | DORELLA::GERVEX 100-C1            | Italy                                    |

|      |                |          |        |                                               |                          |
|------|----------------|----------|--------|-----------------------------------------------|--------------------------|
| C309 | IRIS_313-8172  | Japonica | admix  | FIDJI::GERVEX 1636-C1                         | Philippines              |
| C310 | IRIS_313-8185  | Japonica | GJ-trp | GLADIO::GERVEX 1652-C1                        | Italy                    |
| C311 | IRIS_313-8074  | Japonica | GJ-trp | GOOLARAH::GERVEX 500-C1                       | Australia                |
| C312 | IRIS_313-8075  | Japonica | GJ-tmp | HARRA::GERVEX 501-C1                          | Australia                |
| C313 | IRIS_313-7689  | Indica   | XI-1B  | IR 2307-247-2-2-3::IRGC 77982-C1              | Philippines              |
| C314 | IRIS_313-7902  | Japonica | GJ-trp | IR 63380-16::C1                               | Philippines              |
| C315 | IRIS_313-8010  | Japonica | GJ-trp | IR 71524-44-1-1::C1                           | Philippines              |
| C316 | IRIS_313-7909  | Japonica | GJ-trp | IR 71525-19-1-1::C1                           | Philippines              |
| C317 | IRIS_313-7914  | Japonica | GJ-trp | IRAT 112::C1                                  | Cote d'Ivoire            |
| C318 | IRIS_313-8123  | Japonica | GJ-tmp | MUGA::GERVEX 1099-C1                          | Portugal                 |
| C319 | IRIS_313-8024  | Japonica | GJ-tmp | RIBE 253::GERVEX 54-C1                        | Italy                    |
| C320 | IRIS_313-7994  | Japonica | GJ-trp | VARY MADINIKA 3566::GERVEX 8448-C1            | Madagascar               |
| C321 | IRIS_313-7808  | Indica   | XI-1B  | WAS 173-B-B-6-2-2::C1                         | Senegal                  |
| C322 | IRIS_313-8167  | Japonica | GJ-adm | DELTA::GERVEX 1519-C1                         | France                   |
| C323 | IRIS_313-7646  | Japonica | admix  | BETSILAIZINA::GERVEX 8405-C1                  | Madagascar               |
| C324 | IRIS_313-8454  | Indica   | XI-1A  | LAI YIP ZIM::IRGC 4955-1                      | Taiwan                   |
| C325 | IRIS_313-8502  | Japonica | GJ-tmp | M 102::IRGC 76307-1                           | United States of America |
| C326 | IRIS_313-8434  | Japonica | GJ-trp | TEBONNET::IRGC 66760-1                        | United States of America |
| C327 | IRIS_313-8697  | Indica   | XI-3   | YEBAWYIN::IRGC 33885-1                        | Myanmar                  |
| C328 | IRIS_313-8986  | Indica   | XI-adm | ARC 10754::IRGC 12603-1                       | India                    |
| C329 | IRIS_313-8967  | Indica   | XI-adm | ARC 12576::IRGC 22163-1                       | India                    |
| C330 | IRIS_313-8982  | Indica   | XI-adm | ARC 18112::IRGC 42274-1                       | India                    |
| C331 | IRIS_313-9066  | Indica   | XI-1B  | AUS 177::IRGC 29009-1                         | Bangladesh               |
| C332 | IRIS_313-9148  | Indica   | XI-2   | BADAL 1163::IRGC 32796-1                      | Bangladesh               |
| C333 | IRIS_313-8923  | Japonica | GJ-trp | CALIFORNIA BELLE::IRGC 66836-1                | United States of America |
| C334 | IRIS_313-9966  | Indica   | XI-1B  | CICA 9::IRGC 53079-1                          | Colombia                 |
| C335 | IRIS_313-9023  | Indica   | XI-adm | CR 60-10::IRGC 15777-1                        | India                    |
| C336 | IRIS_313-10177 | Indica   | XI-adm | DA GANG ZHAN::IRGC 67103-1                    | China                    |
| C337 | IRIS_313-10109 | Indica   | XI-3   | EX EBOKOZURU::IRGC 79912-1                    | Nigeria                  |
| C338 | IRIS_313-10114 | Indica   | XI-2   | FACAGRO 64::IRGC 82059-1                      | Burundi                  |
| C339 | IRIS_313-8909  | Indica   | XI-3   | FAYA MOSHI::IRGC 69653-1                      | Tanzania                 |
| C340 | IRIS_313-9302  | Indica   | XI-3   | GAM PAI 30-12-15::IRGC 831-1                  | Thailand                 |
| C341 | IRIS_313-9472  | Indica   | XI-adm | H 6::IRGC 157-1                               | Sri Lanka                |
| C342 | IRIS_313-10080 | Japonica | GJ-trp | HIRAKAWA OKUTE::IRGC 74554-1                  | Japan                    |
| C343 | IRIS_313-9602  | Indica   | XI-adm | HTA 22::IRGC 45827-1                          | Thailand                 |
| C344 | IRIS_313-9922  | Indica   | XI-1B  | IRI 339::IRGC 46956-1                         | Korea, Republic of       |
| C345 | IRIS_313-9262  | Indica   | XI-2   | JHODI BIRUN::IRGC 31812-1                     | Bangladesh               |
| C346 | IRIS_313-9590  | Indica   | XI-3   | KETAN SERANG::IRGC 14615-1                    | Indonesia                |
| C347 | IRIS_313-8925  | Indica   | XI-2   | KURULUTUDU::IRGC 36304-1                      | Sri Lanka                |
| C348 | IRIS_313-9112  | Indica   | XI-3   | LEUANG YAI 344::IRGC 651-1                    | Thailand                 |
| C349 | IRIS_313-10097 | Japonica | GJ-tmp | MAEKJO::IRGC 77666-1                          | Korea, Republic of       |
| C350 | IRIS_313-8930  | Indica   | XI-1B  | MUKKALA BAZAL::IRGC 77279-1                   | Bangladesh               |
| C351 | IRIS_313-10134 | Indica   | XI-3   | PIN GAEW 56::IRGC 7887-1                      | Thailand                 |
| C352 | IRIS_313-10235 | Indica   | XI-adm | PSBRC 68::IRGC 99711-1                        | Philippines              |
| C353 | IRIS_313-10078 | Japonica | GJ-trp | YOSHINO MOCHI::IRGC 74550-1                   | Japan                    |
| C354 | IRIS_313-10333 | Indica   | XI-1B  | B 6136-3-TB-0-1-5::IRGC 117312-1              | Indonesia                |
| C355 | IRIS_313-9184  | Indica   | XI-adm | XI GAN JING REN::IRGC 60035-1                 | China                    |
| C356 | IRIS_313-8453  | Indica   | XI-adm | ARC 18597::IRGC 43299-1                       | India                    |
| C357 | IRIS_313-10301 | Indica   | XI-adm | IRGA 959-1-2-2F-4-1-4A-6-CA-6X::IRGC 117006-1 | Brazil                   |
| C358 | IRIS_313-8586  | Indica   | XI-3   | PLI KHAO::IRGC 64596-1                        | Thailand                 |
| C359 | IRIS_313-8755  | Japonica | GJ-tmp | NORIN 6::IRGC 2633-1                          | Japan                    |
| C360 | IRIS_313-9297  | Japonica | GJ-trp | KORR::IRGC 30751-1                            | Liberia                  |

|      |               |          |          |                                  |                          |
|------|---------------|----------|----------|----------------------------------|--------------------------|
| C361 | IRIS_313-8356 | Japonica | GJ-trp   | BLICCA::IRGC 47151-1             | Philippines              |
| C362 | IRIS_313-8658 | Japonica | GJ-adm   | CP 231::IRGC 34018-1             | United States of America |
| C363 | IRIS_313-8751 | Indica   | XI-3     | HNANWA::IRGC 33118-1             | Myanmar                  |
| C364 | IRIS_313-8595 | Indica   | XI-2     | MAKALIOKA STANDARD::IRGC 12768-1 | Madagascar               |
| C365 | IRIS_313-8725 | Indica   | XI-3     | PULUT BARAYA::IRGC 27393-1       | Indonesia                |
| C366 | IRIS_313-8305 | Indica   | XI-2     | URAIBOOL::IRGC 52785-1           | India                    |
| C367 | CX2           | Indica   | XI-adm   | BR 11                            | Bangladesh               |
| C368 | CX4           | Japonica | XI-adm   | 93072                            | China                    |
| C369 | CX6           | Japonica | admix    | C418                             | China                    |
| C370 | CX10          | Indica   | XI-1A    | Gang 46B                         | China                    |
| C371 | CX11          | Japonica | GJ-adm   | Gumei 2                          | China                    |
| C372 | CX16          | Japonica | GJ-tmp   | Yuan jing 7                      | China                    |
| C373 | CX59          | Japonica | cB (Bas) | Milagrosa, Zawa Banday           | Philippines              |
| C374 | CX64          | Indica   | XI-3     | IRAT 352                         | Brazil                   |
| C375 | CX72          | Japonica | cB (Bas) | Basmati 385                      | Pakistan                 |
| C376 | CX80          | Indica   | XI-1B    | OM 1706                          | Viet Nam                 |
| C377 | CX82          | Indica   | XI-1B    | X 21                             | Viet Nam                 |
| C378 | CX84          | Indica   | XI-adm   | X 23                             | Viet Nam                 |
| C379 | CX89          | Indica   | XI-adm   | M 202                            | United States of America |
| C380 | CX90          | Indica   | XI-1B    | Chhomromg                        | Nepal                    |
| C381 | CX97          | Indica   | XI-1B    | Budda                            | India                    |
| C382 | CX98          | Indica   | XI-2     | Doddabyranella                   | India                    |
| C383 | CX99          | Indica   | XI-2     | Doddi                            | India                    |
| C384 | CX101         | Indica   | XI-1A    | Hei Mi Chan                      | China                    |
| C385 | CX102         | Indica   | XI-1A    | Tek Si Chut                      | Taiwan                   |
| C386 | CX103         | Indica   | admix    | Rubio                            | Peru                     |
| C387 | CX106         | Japonica | GJ-trp   | SAL BUI BAO                      | Viet Nam                 |
| C388 | CX107         | Indica   | XI-3     | Tun Sart                         | Viet Nam                 |
| C389 | CX109         | Japonica | GJ-adm   | Dacca 6                          | India                    |
| C390 | CX111         | Japonica | GJ-trp   | Giza 14                          | Egypt                    |
| C391 | CX112         | Japonica | admix    | Ginga                            | Japan                    |
| C392 | CX114         | Indica   | XI-1A    | Guang Lu Ai 4                    | China                    |
| C393 | CX117         | Indica   | XI-adm   | IR 65600-27-1-2-2                | Philippines              |
| C394 | CX118         | Indica   | XI-adm   | Yetuozai                         | China                    |
| C395 | CX120         | Indica   | XI-adm   | TKM 6                            | India                    |
| C396 | CX121         | Indica   | XI-1B    | Guang122                         | China                    |
| C397 | CX124         | Indica   | XI-adm   | IR 71466-75-3-B-1                | Philippines              |
| C398 | CX125         | Indica   | XI-1B    | CAOZHAO-2                        | China                    |
| C399 | CX134         | Indica   | XI-1B    | IRBB 7                           | Philippines              |
| C400 | CX138         | Japonica | GJ-adm   | Qd_441                           | China                    |
| C401 | CX139         | Japonica | GJ-adm   | Amareles                         | Portugal                 |
| C402 | CX142         | Japonica | GJ-adm   | Ai Yeh Lu                        | China                    |
| C403 | CX143         | Japonica | cB (Bas) | Khasar                           | Iran                     |
| C404 | CX147         | Indica   | XI-adm   | Seberang                         | Malaysia                 |
| C405 | CX149         | Japonica | cB (Bas) | Karnal Local                     | India                    |
| C406 | CX150         | Indica   | XI-1B    | Chorofa                          | Philippines              |
| C407 | CX152         | Indica   | XI-1B    | Cisadane                         | Indonesia                |
| C408 | CX155         | Indica   | XI-2     | Madhukar                         | India                    |
| C409 | CX158         | Indica   | XI-3     | Shwe War Tun                     | Myanmar                  |
| C410 | CX160         | Indica   | XI-2     | W 1263                           | India                    |
| C411 | CX162         | Indica   | XI-1A    | TN1                              | Taiwan                   |
| C412 | CX182         | Indica   | XI-adm   | SLG 1                            | Japan                    |
| C413 | CX206         | Indica   | XI-1B    | IR 2061-522-6-9                  | Philippines              |
| C414 | CX207         | Indica   | XI-adm   | Gaozi                            | China                    |

|      |                |          |          |                         |               |
|------|----------------|----------|----------|-------------------------|---------------|
| C415 | CX219          | Indica   | XI-adm   | FL 478                  | Philippines   |
| C416 | CX220          | Japonica | GJ-trp   | IRAT 109                | Cote d'Ivoire |
| C417 | CX225          | Indica   | XI-1B    | IR 77298-14-1-2         | Philippines   |
| C418 | CX226          | Indica   | XI-1B    | IR 06G113               | Philippines   |
| C419 | CX227          | Indica   | cA (Aus) | KASALATH                | India         |
| C420 | CX230          | Indica   | XI-1B    | IR 64-IL                | Philippines   |
| C421 | CX235          | Indica   | XI-adm   | NSIC RC 9               | Philippines   |
| C422 | CX238          | Indica   | XI-1B    | BW 311-9                | Sri Lanka     |
| C423 | CX241          | Japonica | GJ-trp   | IAC 47                  | Brazil        |
| C424 | CX262          | Japonica | GJ-trp   | IAC 3                   | Brazil        |
| C425 | CX263          | Indica   | XI-adm   | PADISENEMOK             | Malaysia      |
| C426 | CX269          | Japonica | GJ-trp   | IAC 165                 | Brazil        |
| C427 | CX270          | Indica   | XI-1A    | TAICHUNGNATIVE1         | Taiwan        |
| C428 | CX280          | Japonica | admix    | Maravilha               | Brazil        |
| C429 | CX284          | Japonica | GJ-adm   | Han 502                 | China         |
| C430 | CX285          | Japonica | GJ-trp   | Nonglinnuo              | China         |
| C431 | CX286          | Japonica | admix    | C 349                   | China         |
| C432 | CX288          | Indica   | XI-adm   | D 11                    | India         |
| C433 | CX296          | Indica   | XI-adm   | IR 74                   | Philippines   |
| C434 | CX303          | Indica   | XI-adm   | LX 2007                 | China         |
| C435 | CX305          | Indica   | XI-1B    | ZH 5                    | China         |
| C436 | CX313          | Indica   | XI-adm   | R106                    | China         |
| C437 | CX314          | Indica   | XI-1B    | 117                     | China         |
| C438 | CX317          | Japonica | GJ-tmp   | MR 19                   | Malaysia      |
| C439 | CX342          | Indica   | XI-adm   | Wanxian 763             | China         |
| C440 | CX344          | Japonica | GJ-tmp   | Hexi 41                 | China         |
| C441 | CX353          | Japonica | GJ-adm   | CAU 1                   | Viet Nam      |
| C442 | CX355          | Japonica | GJ-trp   | Yunlu 102               | China         |
| C443 | CX356          | Japonica | GJ-tmp   | Yandao 8                | China         |
| C444 | CX357          | Indica   | XI-1B    | PSBRC 80                | Philippines   |
| C445 | CX359          | Japonica | GJ-trp   | Yunlu 103               | China         |
| C446 | CX364          | Indica   | XI-1B    | 42686                   | _no_info      |
| C447 | CX366          | Indica   | XI-adm   | Ganwanxian 37 (926)     | China         |
| C448 | CX367          | Japonica | GJ-trp   | Haogelao                | China         |
| C449 | CX374          | Japonica | GJ-trp   | NERICA 9                | Cote d'Ivoire |
| C450 | CX380          | Japonica | GJ-tmp   | Yandao 9                | China         |
| C451 | CX383          | Japonica | GJ-tmp   | Hongza                  | China         |
| C452 | CX385          | Indica   | XI-1B    | NPT-100                 | China         |
| C453 | CX389          | Japonica | GJ-tmp   | Jinyuan 85              | China         |
| C454 | CX397          | Japonica | GJ-tmp   | Nangeng 46 (Soft Rice)  | China         |
| C455 | CX542          | Indica   | XI-adm   | RR2-6                   | China         |
| C456 | IRIS_313-10642 | Japonica | GJ-tmp   | SACHIKAZE::IRGC 10891-1 | Japan         |
